# Supplementary material for: Multiblock copolymers of PPC with oligomeric PBS: with low brittle–toughness transition temperature
Source: Royal Society of Chemistry journal article supplement (doi:10.1039/c8ra01588k), 2018-01-01
Supplement: c8ra01588k3.pdf [file c8ra01588k3.pdf]

## Supplementary material

### Multiblock Copolymers of PPC with Oligomeric PBS: With Low Brittle-toughness

#### Transition Temperature

Jiaxiang Qin, Limiao Lin, Shuanjin Wang, Shuxian Ye, Weikeng Luo, Min Xiao, Dongmei Han\* and Yuezhong Meng\*

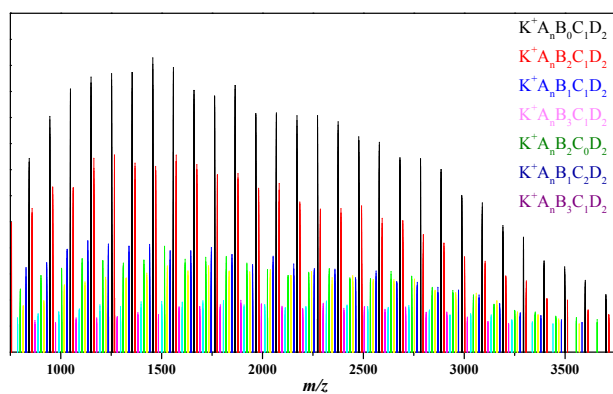

Fig. S1 MALDI-TOF mass spectrum of PPC-OH

A=  $-\text{[OCH}_2\text{CH(CH}_3\text{)OCO]-}$ ; B=  $-\text{[OCH}_2\text{CH(CH}_3\text{)]-}$ ; C=  $-\text{[OCH}_2\text{CH}_2\text{CH}_2\text{CH}_2\text{]-}$ ; D=  $-\text{OH+H}$

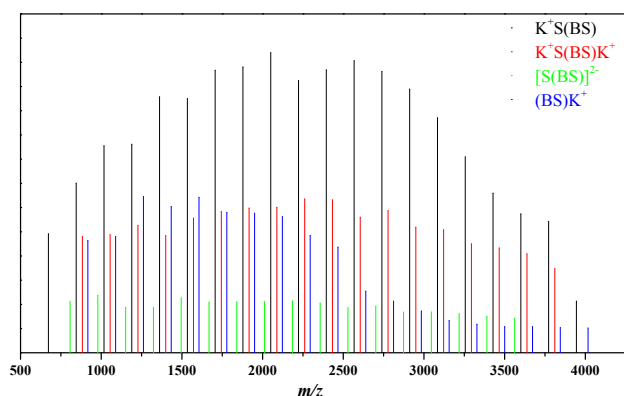

Fig. S2 MALDI-TOF mass spectrum of PBS-COOH

B= 1,4-Butanediol, S= Succinic acid

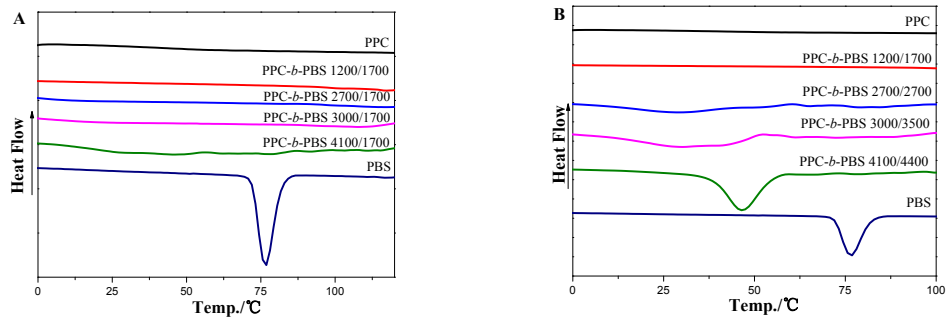

**Fig. S3** Cooling run from the DSC test of (A) PPC, PBS and PPC-*mb*-PBS with the block size of 1200/1700, 2500/1700, 3100/1700, 4000/1700 and (B) PPC, PBS and PPC-*mb*-PBS with the block size of 1200/1700, 2500/2700, 3100/3500, 4000/4400

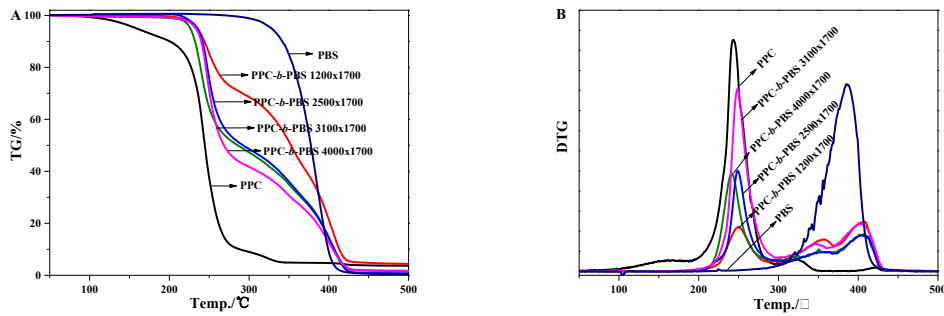

**Fig. S4** TG thermograms of PPC, PBS and PPC-*mb*-PBS with the block size of 1200/1700, 2500/1700, 3100/1700 and 4000/1700: (A) TG; (B) DTG

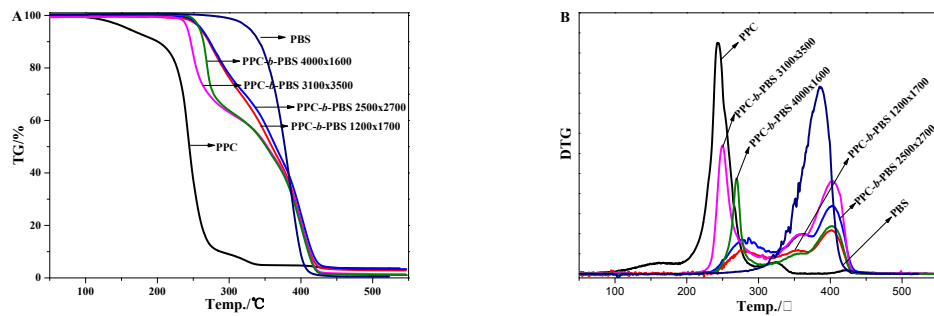

**Fig. S5** TG thermograms of PPC, PBS and PPC-*mb*-PBS with the block size of 1200/1700, 2500/2700, 3100/3500 and 4000/4400: (A) TG; (B) DTG

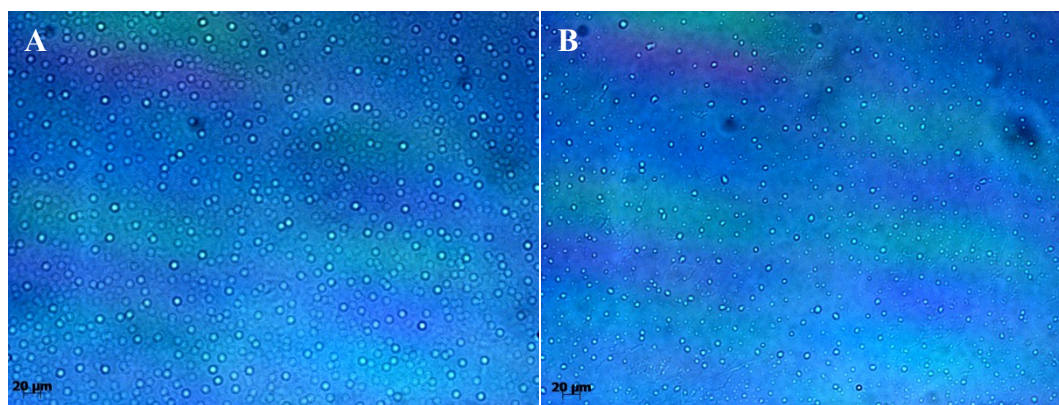

**Fig. S6** Polarizing optical micrographs of PPC-mb-PBS 2500/1700 (A) and PPC-mb-PBS 3100/1700 (B) crystallized at 90 °C for 2 h.
